# Supplementary material for: Novel non-mulberry silk fibroin nanoparticles with enhanced activity as potential candidate in nanocarrier mediated delivery system
Source: Royal Society of Chemistry journal article supplement (doi:10.1039/c9ra08901b), 2020-01-01
Supplement: c9ra08901b1.pdf [file c9ra08901b1.pdf]

## Supplementary Information

# Novel non-mulberry silk fibroin nanoparticles with enhanced activity as potential candidate in nanocarrier mediated delivery system

Rashmi Rekha Baruah,<sup>a</sup> Mohan Chandra Kalita<sup>b</sup> and Dipali Devi <sup>\*a</sup>

<sup>a</sup> *Seri-biotechnology Laboratory, Life Sciences Division, Institute of Advanced Study in Science and Technology (IASST), Paschim Boragaon, Guwahati 781035, India*

<sup>b</sup> *Department of Biotechnology, Gauhati University, Guwahati 781014, India*

\*Corresponding author: Dipali Devi, Seri-biotechnology Laboratory, IASST, Guwahati 781035, India. E-mail address: dipali.devi@gmail.com Tel.: +919678073712

**Table S1.** Particle size, zeta potential and polydispersity index of DOX loaded AA-SFNps, data represents mean  $\pm$  SD (n = 3)

| Sample       | Size (nm)         | Zeta potential (mV) | Polydispersity index (Pdl) |
|--------------|-------------------|---------------------|----------------------------|
| AA-SFNps     | 190.3 $\pm$ 6.1   | - 28.1 $\pm$ 3.4    | 0.278 $\pm$ 0.37           |
| AA-SFNps-DOX | 248.03 $\pm$ 7.54 | - 17.8 $\pm$ 2.83   | 0.492 $\pm$ 0.04           |

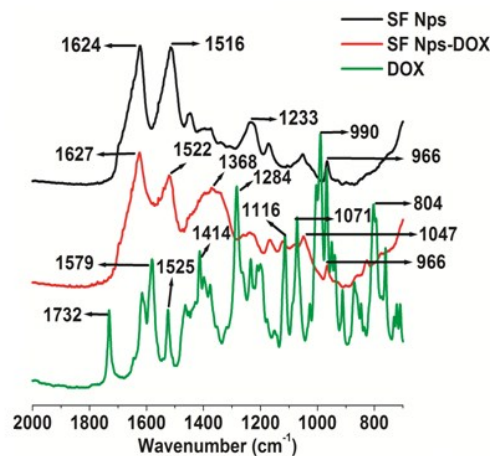

**Fig S1.** FTIR spectra showing formation of new peaks as a result of Doxorubicin loading into AA-SFNps.
